# Supplementary material
Source: PubMed Central journal article supplement (PMC4788106)
Supplement: NIHMS743448-supplement-1.pdf [file NIHMS743448-supplement-1.pdf]

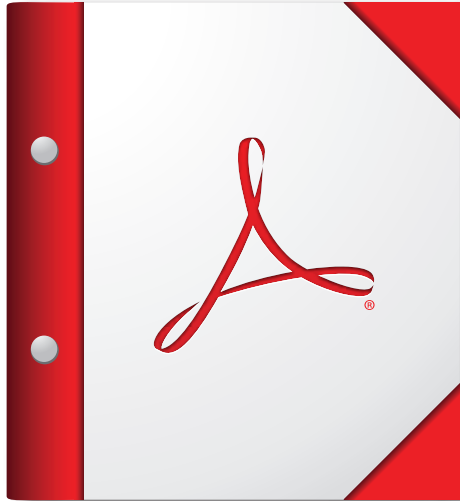

**For the best experience, open this PDF portfolio in  
Acrobat 9 or Adobe Reader 9, or later.**

[Get Adobe Reader Now!](#)
